# Supplementary material for: iTRAQ-Based Comparative Proteomic Analysis of Seedling Leaves of Two Upland Cotton Genotypes Differing in Salt Tolerance
Source: Front Plant Sci. 2017 Dec 13;8:2113. doi: 10.3389/fpls.2017.02113 (PMC5733471; doi:10.3389/fpls.2017.02113)
Supplement: Supplementary file 3 [file DataSheet3.XLSX]

## Sheet: Sheet1
Supplementary Table S3: Detailed group information about the 58 salt-responsive DAPs present in both Nan Dan Ba Di Da Hua (N) and Earlistaple 7 (Z) subjected to 200 mM NaCl treatment.
Group	Accessiona	N4/Nckb	N24/Nckb	Z4/Zckb	Z24/Zckb	Scorec	Massd	Sequence	NCBInr Description	Uniprot_Swissprot Description	COG Function-Description	COG Functional-Categories	KEGG(ko_id|rank|evalue|score|identity|ko_definition)	GO Biological_Process	GO Molecular_Function	GO Cellular_Component
1	Gorai.010G176000.1|PACid:26758329	0.59±0.10	0.49±0.08	0.63±0.05	0.66±0.08	1862	43493	MAAMATALTSLSSSPKPSFLDHNKSSFSGTQIPSRFTPIKSSSHNSAISMSLTPPYDLQSFEFQPIKESYVSREMTRRYMMDMITYADTDVIIVGAGSAGLSCAYEISKNPNIRVAIIEQSVSPGGGAWLGGQLFSAMVVRKPAHRFLDELGIQYDEQEDYVVIKHAALFTSTIMSKLLARPNVKLFNAVAAEDLIVKGNRVAGVVTNWALVSMNHDTQSCMDPNVMESKVVVSSCGHDGPFGATGVKRLKSIGMIDSVPGMKALDMNTAEDAIVRLTREIVPGMIVTGMEVAEIDGAPRMGPTFGAMMISGQKAAHLALKALGQPNAVDGTFSEAERVQPEFVLAAAETEETVDA	hypothetical protein VITISV_019223 [Vitis vinifera]	Thiamine thiazole synthase 2, chloroplastic OS=Vitis vinifera GN=THI1-2 PE=3 SV=1	Flavoprotein involved in thiazole biosynthesis	Coenzyme transport and metabolism ;	K03146|1|4e-177|618|vvi:100265774|thiamine biosynthetic enzyme	GO:0009409//response to cold;GO:0018131//oxazole or thiazole biosynthetic process;GO:0006974//response to DNA damage stimulus	GO:0008270//zinc ion binding;GO:0042803//protein homodimerization activity	GO:0010319//stromule;GO:0009570//chloroplast stroma;GO:0009579//thylakoid;GO:0005739//mitochondrion
2	Gorai.006G223900.1|PACid:26829862	1.21±0.06	1.33±0.08	1.22±0.07	1.94±0.11	859	65099	MALSVEKTAAGREYKVKDMSQADFGRLEIELAEVEMPGLMACRTEFGPAQPFKGAKITGSLHMTIQTAVLIETLTALGAEVRWCSCNIFSTQDHAAAAIARDSAAVFAWKGETLQEYWWCTERALDWGPTGGPDLIVDDGGDATLLIHEGVKAEEVYEKTGQLPDPASTDNAEFQIVLTIIRDGLKADPKKYRRMKERLVGVSEETTTGVKRLYQMQANGTLLFPAINVNDSVTKSKFDNLYGCRHSLPDGLMRATDVMIAGKVAVVCGYGDVGKGCAAALKQAGARVIVTEIDPICALQALMEGLQVLTLEDVVSEADIFVTTTGNKDIIMVDHMRKMKNNAIVCNIGHFDNEIDMLGLENYPGVKRITIKPQTDRWVFPETKTGIIVLAEGRLMNLG…	unnamed protein product [Vitis vinifera]	Adenosylhomocysteinase OS=Catharanthus roseus GN=SAHH PE=2 SV=1	S-adenosylhomocysteine hydrolase	Coenzyme transport and metabolism ;	K01251|1|0.0|897|gmx:100786939|adenosylhomocysteinase [EC:3.3.1.1]	GO:0051788//response to misfolded protein;GO:0009853//photorespiration;GO:0006094//gluconeogenesis;GO:0006346//methylation-dependent chromatin silencing;GO:0006833//water transport;GO:0009793//embryo development ending in seed dormancy;GO:0051049//regulation of transport;GO:0009651//response to salt stress;GO:0080129//proteasome core complex assembly;GO:0048767//root hair elongation;GO:0006972//h…	GO:0000166//nucleotide binding;GO:0004013//adenosylhomocysteinase activity;GO:0005507//copper ion binding	GO:0048046//apoplast;GO:0005794//Golgi apparatus;GO:0005829//cytosol;GO:0009506//plasmodesma;GO:0005886//plasma membrane
	Gorai.001G201400.1|PACid:26822370	1.27±0.24	1.54±0.18	1.23±0.21	1.65±0.31	960	35008	MSPTESSREENVYMAKLAEQAERYEEMVEFMENVAKTVDVGELTVEERNLLSVAYKNVIGARRASWRIISSIEQKEESRGNEDHVATIKEYRSKIEAELSKICDGILSLLESHLIPSASSAESKVFYLKMKGDYHRYLAEFKTAAERKEAAESTLLAYKSAQDIALGDLAPTHPIRLGLALNFSVFYYEILNSPDRACNLAKQAFDEAISELDTLGEESYKDSTLIMQLLRDNLTLWTSDITDEAGDEIKEASKPESGEGQQ	14-3-3g protein [Gossypium hirsutum]	14-3-3-like protein E OS=Nicotiana tabacum PE=2 SV=1	14-3-3 family protein	Signal transduction mechanisms ;	K06630|1|4e-139|491|pop:POPTR_580782|tyrosine 3-monooxygenase/tryptophan 5-monooxygenase activation protein	GO:0006588//activation of tryptophan 5-monooxygenase activity;GO:0000077//DNA damage checkpoint;GO:0046686//response to cadmium ion	GO:0005524//ATP binding;GO:0019904//protein domain specific binding;GO:0004623//phospholipase A2 activity	GO:0005739//mitochondrion;GO:0009570//chloroplast stroma;GO:0005635//nuclear envelope;GO:0005886//plasma membrane
	Gorai.005G132000.2|PACid:26802611	1.65±0.10	3.43±0.24	1.51±0.10	3.67±0.24	894	71220	MAANGDERKVQKNYWIEHSVDLTVEAMMLDSKAADIDKEERPEVLSLLPPYEGKTILELGAGIGRFTGDLAKKAGHVIALDFIENVIKKNETINGHYKNVKFLCADVTSPDLAFTEGSLDLIFSNWLLMYLSDKEVENLAERMLKWLKVGGHIFFRESCFHQSGDCKRKNNPTHYREPRFYTKVFKECQATDDSGNSFELSLVGCKCIGAYVKNKKNQNQICWIFQKVVSDNDKGFQRFLDSVQYKSNSILRYERVFGPGYVSTGGIETTKEFVGKLDLKPGQKVLDVGCGIGGGDIYMAEEFDVHVVGIDLSVNMISFALERATGLKCSVEFEVADCTKKVYPDNSFDVIYSRDTILHIHDKPALFRSFYKWLKPGGKLLISDYCKSSKTPSTEFAAY…	phosphoethanolamine N-methyltransferase [Gossypium hirsutum]	Phosphoethanolamine N-methyltransferase 1 OS=Arabidopsis thaliana GN=NMT1 PE=2 SV=1	SAM-dependent methyltransferases	Secondary metabolites biosynthesis, transport and catabolism ; General function prediction only ;	K05929|1|0.0|876|rcu:RCOM_0161380|phosphoethanolamine N-methyltransferase [EC:2.1.1.103]	GO:0043085//positive regulation of catalytic activity;GO:0019252//starch biosynthetic process;GO:0000023//maltose metabolic process;GO:0009698//phenylpropanoid metabolic process;GO:0042425//choline biosynthetic process;GO:0010183//pollen tube guidance;GO:0006598//polyamine catabolic process;GO:0042398//cellular modified amino acid biosynthetic process;GO:0009555//pollen development;GO:0032259//me…	GO:0000234//phosphoethanolamine N-methyltransferase activity;GO:0004379//glycylpeptide N-tetradecanoyltransferase activity;GO:0052667//phosphomethylethanolamine N-methyltransferase activity	GO:0005829//cytosol
3	Gorai.011G094800.1|PACid:26808449	1.96±0.21	1.04±0.08	1.21±0.05	0.96±0.07	892	20339	MGRVRTKTVKKSSRQVIERYYSRMTLDFHTNKKIIEEVAIIPSKRLRNKIAGFSTHLMKRIQKGPVRGISLKLQEEERERRMDFVPDESAIKVDQIEVDKETLDMLSVLGMADIPGLVKVDPVAVAVPQIGFGRGGGPGRRF	40S ribosomal protein S17, putative [Ricinus communis] >gi|223530330|gb|EEF32224.1| 40S ribosomal protein S17, putative [Ricinus communis]	40S ribosomal protein S17 OS=Solanum lycopersicum GN=RPS17 PE=2 SV=3	Ribosomal protein S17E	Translation, ribosomal structure and biogenesis ;	K02962|1|6e-65|243|rcu:RCOM_0293410|small subunit ribosomal protein S17e	GO:0006412//translation	GO:0003735//structural constituent of ribosome	-
	Gorai.006G121400.1|PACid:26830575	1.58±0.14	0.80±0.07	1.64±0.19	1.21±0.15	371	33534	MSSIGTGYDLSVTTFSPDGRVFQIEYAAKAVDNSGTVIGIKCKDGIVMGVEKLIASKMMLPGSNRRIHSVHRHSGMAVAGLAADGRQIVARAKSEATNYQSVYGEPIPVKELAERVASYVHLCTLYWWLRPFGCGIILGGYDRDGPQLYMVEPSGISYRYFGAAIGKGKQAAKTEIEKLNLSEMTCREGVIEVAKISIYKVHDEAKDKAFELEMSWVCDESKQQHQKVPDDLLEEAKVAARTALEEMDAD	predicted protein [Populus trichocarpa] >gi|118488197|gb|ABK95918.1| unknown [Populus trichocarpa] >gi|222846906|gb|EEE84453.1| predicted protein [Populus trichocarpa]	Proteasome subunit alpha type-3 OS=Spinacia oleracea GN=PAG1 PE=2 SV=1	20S proteasome, alpha and beta subunits	Posttranslational modification, protein turnover, chaperones ;	K02727|1|4e-133|471|pop:POPTR_548687|20S proteasome subunit alpha 7 [EC:3.4.25.1]	GO:0009651//response to salt stress;GO:0051788//response to misfolded protein;GO:0009409//response to cold;GO:0080129//proteasome core complex assembly;GO:0006972//hyperosmotic response;GO:0006833//water transport;GO:0007030//Golgi organization;GO:0006096//glycolysis;GO:0006094//gluconeogenesis;GO:0009853//photorespiration;GO:0046686//response to cadmium ion	GO:0004298//threonine-type endopeptidase activity	GO:0005829//cytosol;GO:0005774//vacuolar membrane;GO:0019773//proteasome core complex, alpha-subunit complex;GO:0005634//nucleus;GO:0005886//plasma membrane;GO:0048046//apoplast
	Gorai.004G166700.1|PACid:26772725	1.67±0.04	0.94±0.12	1.30±0.10	1.28±0.20	508	20455	TRFRKQHRGRMKGISYRGNRICFGRYALQALEPAWITSRQIEAGRRAMTRNVRRGGKIWVRIFPDKPVTVRPTETRMGSGKGSPEYWVAVVKPGRILYEMSGVAENIARKAISIAANIEPKERKIKKMIQPQTHLNVADNSGARELI	ribosomal protein L16 [Theobroma cacao] >gi|372290965|ref|YP_005087730.1| rpl16 gene product (chloroplast) [Gossypium raimondii] >gi|372291066|ref|YP_005087826.1| rpl16 gene product (chloroplast) [Gossypium darwinii] >gi|372291421|ref|YP_005088317.1| rpl16 gene product (chloroplast) [Gossypium tomentosum] >gi|372291519|ref|YP_005088413.1| rpl16 gene product (chloroplast) [Gossypium herbaceum subs…	50S ribosomal protein L16, chloroplastic OS=Spinacia oleracea GN=rpl16 PE=1 SV=2	Ribosomal protein L16/L10E	Translation, ribosomal structure and biogenesis ;	K02878|1|1e-62|236|vvi:4025020|large subunit ribosomal protein L16	GO:0006412//translation	GO:0003735//structural constituent of ribosome;GO:0019843//rRNA binding	GO:0009507//chloroplast;GO:0005739//mitochondrion
	Gorai.003G002800.1|PACid:26797857	1.20±0.15	1.17±0.08	1.28±0.05	1.19±0.04	765	64782	MDPYKFRPSSSFDSPFWTTNSGAPVWNNNSSLTVGARGPILLEDYHLVEKLANFDRERIPERVVHARGASAKGFFEVTHDISQLTCADFLRAPGVQTPLIVRFSTVIHERGSPETLRDPRGFAVKFYTREGNFDLVGNNFPVFFIRDGMKFPDMVHALKPNPKSHIQENWRILDFFSHHPESLHMFTFLFDDIGVPQDYRHMDGSGVHTYTLINKAGKAHYVKFHWKPTCGVKSLLEDEAIRVGGANHSHATQDLYDSIAAGNYPEWKLFIQIMDPLHEDRFDFDPLDVTKTWPEDIFPLQPVGRMVLNKNIDNFFAENEQLAFCPSLIVPGIYYSDDKLLQTRIFSYSDTQRHRLGPNYLQLPANAPKCAHHNNHHEGFMNFMHRDEEVNYFPSRYDP…	RecName: Full=Catalase isozyme 2 >gi|18488|emb|CAA39998.1| subunit 2 of cotton catalase [Gossypium hirsutum]	Catalase isozyme 2 OS=Gossypium hirsutum GN=CAT2 PE=2 SV=1	Catalase	Inorganic ion transport and metabolism ;	K03781|1|0.0|961|vvi:100244516|catalase [EC:1.11.1.6]	GO:0016036//cellular response to phosphate starvation;GO:0042744//hydrogen peroxide catabolic process;GO:0006635//fatty acid beta-oxidation;GO:0006995//cellular response to nitrogen starvation;GO:0016558//protein import into peroxisome matrix;GO:0048573//photoperiodism, flowering;GO:0045454//cell redox homeostasis;GO:0005982//starch metabolic process;GO:0003333//amino acid transmembrane transport…	GO:0005515//protein binding;GO:0020037//heme binding;GO:0050897//cobalt ion binding;GO:0004096//catalase activity;GO:0015171//amino acid transmembrane transporter activity	GO:0009941//chloroplast envelope;GO:0048046//apoplast;GO:0010319//stromule;GO:0022626//cytosolic ribosome;GO:0005618//cell wall;GO:0005777//peroxisome;GO:0009570//chloroplast stroma;GO:0005886//plasma membrane;GO:0005634//nucleus;GO:0005739//mitochondrion
4	Gorai.009G433900.1|PACid:26765535	0.88±0.07	0.64±0.14	0.88±0.06	0.63±0.17	717	52596	MALQAAALVPSTFSVPKEGKSGASFKDSSLFGVSLSDHIKADFTSSALRCKREFNHRIGAVRAQTTATATPAITRSTVDGKKTLRKGSVIITGASSGLGLATAKALAETGKWHVIMACRDFLKAERAAKSAGMSKENYTIMHLDLASLDSVRQFVDSYKRSGRPLDVLVCNAAVYQPTAKEPTFTAEGFELSVGTNHLGHFLLSRLLLDDLKQSDYPSKRLIIVGSITGNTNTLAGNVPPKANLGDLRGLAGGLNGLNSSAMIDGGDFDGAKAYKDSKVCNMLTMQEFHRRFHEETGITFASLYPGCIATTGLFREHIPLFRLLFPPFQKYITKGFVSEEEAGKRLAQVVSDPSLTKSGVYWSWNKDSASFENQLSQEASDQDKARKIWELSEKLVGLA	unknown [Lotus japonicus]	Protochlorophyllide reductase, chloroplastic OS=Cucumis sativus GN=PORA PE=2 SV=1	Dehydrogenases with different specificities (related to short-chain alcohol dehydrogenases)	Lipid transport and metabolism ; Secondary metabolites biosynthesis, transport and catabolism ; General function prediction only ;	K00218|1|0.0|653|rcu:RCOM_0252880|protochlorophyllide reductase [EC:1.3.1.33]	GO:0019252//starch biosynthetic process;GO:0015995//chlorophyll biosynthetic process;GO:0009965//leaf morphogenesis;GO:0030154//cell differentiation;GO:0019344//cysteine biosynthetic process;GO:0055114//oxidation-reduction process;GO:0045893//positive regulation of transcription, DNA-dependent;GO:0009073//aromatic amino acid family biosynthetic process;GO:0009723//response to ethylene stimulus	GO:0000166//nucleotide binding;GO:0016630//protochlorophyllide reductase activity;GO:0003959//NADPH dehydrogenase activity	GO:0009941//chloroplast envelope;GO:0009535//chloroplast thylakoid membrane
	Gorai.006G214200.1|PACid:26830537	0.95±0.04	0.83±0.03	0.92±0.04	0.73±0.02	1247	48465	MATTNPFDLLDDDTEDPSLVIAAAEQQKLEKPKKAPASAPAQAQPAKPAKFPSKPSPPAQAVREARNDPGRGGRGAGRGGGRGYGGRGFNRDSNVNDNSNAFSGGYRPSEEGEERKQTERRGGYGGPRGSFRGGRRGGFNDGESGEGERPRRMYDRRSGTGRGNEFKRDGSGRGNWGSPTDGIAPETEENVPENEKNVSIEKQSGEEDAMDAGKENAANEAEEKEPENKEMTLEEYEKIVEEKRKALLALKTEERKVDTKEFESMQQLSSKKSNDDIFIKLGSEKDKRKDADKEERVKKSVSINEFLKPAEGERYYGPGRGRGRGRGPRGGYGGNTASSVLAPSIEDPGHFPSLGGK	PREDICTED: uncharacterized protein LOC100265608 [Vitis vinifera] >gi|296085734|emb|CBI29539.3| unnamed protein product [Vitis vinifera]	-	-	-	K13199|1|1e-67|254|vvi:100265608|plasminogen activator inhibitor 1 RNA-binding protein	-	-
	Gorai.012G098300.1|PACid:26828952	0.86±0.08	0.73±0.07	0.93±0.04	0.69±0.05	475	245251	MAPKTGKMKAHKAKGDKKKKEERVLPTVIEITVETPEESEVTLKGISSDKILDIRKLLGVHVETCHLTNISLSHEVRGNQLKESVDIVSLKPCQLSIVQEDYTEDLAVAHIRRLLDIVACTTSFGSPKSATRTIPKESPSKESAAVDDAPTNGVESPDNSKAKEKPEATAAAVSMCPPPRLGQFYDFFSFSHLTPPIQYIRRSSRPFLEDKTEDDFFQIDVRVCSGKPMTIVASRKGFYPAGKRPLLCHSLVTLLQQISRVFDAAYKALMKAFAEHNKFGNLPYGFRANTWVVPPVVADNPSVFPPLPVEDENWGGNGGGQGRDGKHDNRQWAKEFAILAAMPCKTAEERQIRDRKAFLLHSLFVDTSVLKAIAAIKNIIEINQNALNGPSASILHEEK…	predicted protein [Populus trichocarpa] >gi|222854396|gb|EEE91943.1| predicted protein [Populus trichocarpa]	Kinesin light chain OS=Loligo pealeii PE=2 SV=1	FOG: TPR repeat	General function prediction only ;	K03255|1|1e-103|377|ppp:PHYPADRAFT_203627|protein TIF31	GO:0006655//phosphatidylglycerol biosynthetic process;GO:0010103//stomatal complex morphogenesis;GO:0019288//isopentenyl diphosphate biosynthetic process, mevalonate-independent pathway;GO:0009737//response to abscisic acid stimulus	-	GO:0005634//nucleus
	Gorai.010G137900.1|PACid:26759105	0.97±0.07	0.76±0.04	1.00±0.11	0.81±0.02	1521	58684	MATLSMDIATTFINFTTRCRRRSGIKTTVLPLFFKSSTINTRSLSSKPLPSSSLTVLSTSNFSKVNRCRRFSVAATATTTPQSEDSDVSTKIPPDTRIPATIITGFLGSGKTTLLNHILTADHGKRIAVIENEYGEVDIDGSLVAAKAAGAEDIVMLNNGCLCCTVRGDLVRMIAELVSKKKGKFDHIVIETTGLANPAPIIQTFYAEDQVFNDVKLDGVVTLVDAKHAGFHLDEVKPKGVVNEAVEQIAYADRIIVNKTDLVGEPEITSLVKRIRSINGMAHLKHTEFGKVDLEYVLGIGGFDLERLIESSVNDGAKEDHAHHHDHDHHHHHHHEHEHKHDHHHDHTHDPGVSSVSIVCEGSLDLEKANIWLGTLLLERSEDIYRMKGLLSVQGMDER…	hypothetical protein VITISV_014505 [Vitis vinifera]	Uncharacterized protein in trpE 3'region (Fragment) OS=Spirochaeta aurantia PE=4 SV=1	Putative GTPases (G3E family)	General function prediction only ;	-	-	-	GO:0009570//chloroplast stroma
	Gorai.006G122100.1|PACid:26832576	1.03±0.03	0.82±0.04	1.07±0.06	0.79±0.07	797	14024	MAKRLIPSFNRILVEKIIPPSKTNSGILLPEKTPKLNSGKVVAVGPGARDRDGKHIPVNLKEGDTVLLPEYGGTEVKLGEKEYHLYRDDDILGTLHD	predicted protein [Populus trichocarpa] >gi|222847230|gb|EEE84777.1| predicted protein [Populus trichocarpa]	10 kDa chaperonin OS=Brassica napus PE=3 SV=1	Co-chaperonin GroES (HSP10)	Posttranslational modification, protein turnover, chaperones ;	K04078|1|3e-45|177|pop:POPTR_829690|chaperonin GroES	GO:0034976//response to endoplasmic reticulum stress;GO:0006457//protein folding;GO:0009408//response to heat;GO:0006569//tryptophan catabolic process;GO:0009644//response to high light intensity;GO:0042542//response to hydrogen peroxide	GO:0005507//copper ion binding;GO:0051087//chaperone binding;GO:0005524//ATP binding	GO:0005739//mitochondrion;GO:0009941//chloroplast envelope;GO:0009570//chloroplast stroma
	Gorai.006G136500.1|PACid:26833621	0.86±0.09	0.53±0.04	1.09±0.04	0.74±0.10	634	181898	MASLVSSPFTLPASKADQLSSLSQKHFFLHSFLPKKINNLPNSKSSLKVKCAAVGNGLFTQTTPEVRRIVPENKNNLPTVKIVYVVLEAQYQSSLSSAVQSLNQNSNFASFEVVGYLVEELRDENTYKTFCKDLEDANIFIGSLIFVEELALKVKTAVEKERDRLDAVLVFPSMPEVMRLNKLGSFSMSQLGQSKSPFFQLFKRKKQGAGFADSMLKLVRTLPKVLKYLPSDKAQDARLYILSLQFWLGGSPDNLQNFLKMISSSYVPALKGTKVDYSDPVLFLDSGIWHPLAPCMYDDVKEYLNWYGTRRDVNEKLRGPDAPVIGLVLQRSHIVTGDESHYVAVIMELEAKGAKVIPIFAGGLDFSGPVERFLIDPVTKKPMVNSVVSLTGFALVGGP…	magnesium chelatase H subunit [Prunus avium]	Magnesium-chelatase subunit H OS=Rhodobacter sphaeroides (strain ATCC 17023 / 2.4.1 / NCIB 8253 / DSM 158) GN=bchH PE=3 SV=1	Cobalamin biosynthesis protein CobN and related Mg-chelatases	Coenzyme transport and metabolism ;	K03403|1|0.0|2683|gmx:100806079|magnesium chelatase subunit H [EC:6.6.1.1]	GO:0019684//photosynthesis, light reaction;GO:0015995//chlorophyll biosynthetic process	GO:0051116//cobaltochelatase activity;GO:0000166//nucleotide binding	GO:0005739//mitochondrion;GO:0010007//magnesium chelatase complex;GO:0009706//chloroplast inner membrane
	Gorai.004G211800.1|PACid:26776936	0.90±0.11	0.62±0.03	1.12±0.04	0.75±0.01	3230	54989	MREILHVQAGQCGNQIGGKFWEVVCDEHGIDASGNYVGTSPVQLERLNVYYNEASGGRYVPRAVLMDLEPGTMDSLRTGPYGKLFRPDNFVFGQNGAGNNWAKGHYTEGAELIDSVLDVVRKEAENCDCLQGFQVCHSLGGGTGSGMGTLLISKIREEYPDRMMLTFSVFPSPKVSDTVVEPYNATLSVHQLVENADECMVLDNEALYDICFRTLKLTNPSFGDLNHLISTTMSGVTCCLRFPGQLNSDLRKLAVNLIPFPRLHFFMVGFAPLTSRGSQQYRALTIPELTQQMWDSKNMMCAADPRHGRYLTASAMFRGKMSTKEVDEQMINVQNKNSSYFVEWIPNNVKSSVCDIPPTGLTMSSTFMGNSTSIQEMFRRVSEQFTVMFRRKAFLHWYT…	beta-tubulin 1 [Gossypium hirsutum]	Tubulin beta-1 chain (Fragment) OS=Avena sativa GN=TUBB1 PE=2 SV=1	Tubulin	Cytoskeleton ;	K07375|1|0.0|829|bdi:100829397|tubulin beta	GO:0051258//protein polymerization;GO:0006184//GTP catabolic process;GO:0007018//microtubule-based movement	GO:0003924//GTPase activity;GO:0005198//structural molecule activity;GO:0005525//GTP binding	GO:0005737//cytoplasm
5	Gorai.010G180300.1|PACid:26761375	1.15±0.03	1.45±0.03	0.90±0.02	1.37±0.06	1892	48292	MSCSNLTMWVSSKPSLSDTSSLSFRSFISPFQLPSQSSTPGNPSRSSSVTPVHCGLRELRDRIDSVKNTQKITEAMKLVAAAKVRRAQEAVVNGRPFSESLVEVLYNINEQLQTEDIDAPLTNVRPVKKVALVVVTGDRGLCGGFNNAIIKKAEARIAELKQLGLDYTIISVGKKGNSYFIRRPYIPVDRFLDGSSLPTAKEAQAIADDVFSLFVSEEVDKVELLYTKFVSLVKSDPVIHTLLPLSPKGEICDVNGVCVDAAEDEFFRLTTREGKLTVEREVMRTQTADFSPILQFEQDPVQILDALLPLYLNSQVLRALQESLASELAARMSAMSNATDNAQELKKTLSIVYNRQRQAKITGEILEIVAGANALV	chloroplastic ATP synthase gamma subunit [Glycine max]	ATP synthase subunit gamma, chloroplastic (Fragment) OS=Vigna unguiculata PE=1 SV=1	F0F1-type ATP synthase, gamma subunit	Energy production and conversion ;	K02115|1|8e-159|557|rcu:RCOM_0904560|F-type H+-transporting ATPase subunit gamma [EC:3.6.3.14]	GO:0009695//jasmonic acid biosynthetic process;GO:0009965//leaf morphogenesis;GO:0043085//positive regulation of catalytic activity;GO:0019344//cysteine biosynthetic process;GO:0009072//aromatic amino acid family metabolic process;GO:0042777//plasma membrane ATP synthesis coupled proton transport;GO:0009772//photosynthetic electron transport in photosystem II;GO:0006364//rRNA processing;GO:001925…	GO:0030234//enzyme regulator activity;GO:0046961//proton-transporting ATPase activity, rotational mechanism;GO:0005524//ATP binding;GO:0046933//hydrogen ion transporting ATP synthase activity, rotational mechanism	GO:0009544//chloroplast ATP synthase complex;GO:0045261//proton-transporting ATP synthase complex, catalytic core F(1);GO:0009941//chloroplast envelope;GO:0005886//plasma membrane
	Gorai.004G093200.1|PACid:26775109	0.91±0.04	1.31±0.10	0.92±0.04	1.31±0.07	1707	40702	MPEKMACFQYIVAALCFAVLLEGSLSKAQLTPTFYDETCPNVTAIIRHVLVNASFSDPRIGASLIRLHFHDCFVQTPCVCFQGCDASILLDDPVNGEKEAIPNNNSARGYEVIDAMKAALESACPNTVSCADILAIASEQSVSTLAGGPSWAVPLGRRDGFTANRTLANSNLPGFNNTLDRLKNRFSNVGLNTSIDLVALSGAHTFGRAQCLTFTSRLYNFTGVGDTDPTLNTTYLEELRQICPQGGNSSVLTNLDPTTPDGFDNNYFTNLQVNRGLLRSDQNLFSTEGADTIEIVNRFSSNQTAFFESFVESMIRMGNISPLTGTEGEIRSNCRAVNSATIRSNSDAALVSSI	apoplastic anionic gaiacol peroxidase [Gossypium hirsutum]	Peroxidase 15 OS=Ipomoea batatas GN=pod PE=1 SV=1	-	-	K00430|1|9e-131|464|pop:POPTR_817692|peroxidase [EC:1.11.1.7]	GO:0051707//response to other organism;GO:0009628//response to abiotic stimulus;GO:0040007//growth	GO:0005488//binding;GO:0016491//oxidoreductase activity	GO:0005618//cell wall;GO:0016020//membrane
	Gorai.007G283700.1|PACid:26785430	1.07±0.05	1.40±0.15	0.96±0.04	1.28±0.16	1367	36028	MAFLSLNLSSLHHTSTNPLILRCTPLNLRTPSQKPFSIRSQAAPVLSQDDLKKLAADKAVESVKSGMILGLGTGSTAAFVVDKIGQLLSTGQLSNIVGIPTSKRTQEQAASLNIPLSTLDLHPRIDLAIDGADEVDPNLDLVKGRGGALLREKMVEAASSSFIVVADDSKLVSGLGGSGLAMPVEVVQFCWKYNLVRLQGLFKELGCEAKLRLVGDGSEKPYVTDNGNYIVDLYFKNPIKDGFGAGKEISALEGVVEHGLFLGMATSVIIAGKTGIEVMTK	PREDICTED: probable ribose-5-phosphate isomerase [Vitis vinifera]	Probable ribose-5-phosphate isomerase OS=Arabidopsis thaliana GN=At2g01290 PE=2 SV=1	Ribose 5-phosphate isomerase	Carbohydrate transport and metabolism ;	K01807|1|5e-110|395|rcu:RCOM_1427780|ribose 5-phosphate isomerase A [EC:5.3.1.6]	GO:0031348//negative regulation of defense response;GO:0009595//detection of biotic stimulus;GO:0009867//jasmonic acid mediated signaling pathway;GO:0009697//salicylic acid biosynthetic process;GO:0009862//systemic acquired resistance, salicylic acid mediated signaling pathway;GO:0006636//unsaturated fatty acid biosynthetic process;GO:0010363//regulation of plant-type hypersensitive response;GO:0…	GO:0004751//ribose-5-phosphate isomerase activity	GO:0009941//chloroplast envelope;GO:0009570//chloroplast stroma;GO:0009535//chloroplast thylakoid membrane
	Gorai.007G151700.1|PACid:26784576	1.08±0.08	1.32±0.19	0.95±0.08	1.25±0.11	1925	76805	MYSHLTSLASKARLAKNRIQLNGTRLSWSRNYAAKDIKFGVEARALMLSGVQELADAVKLTMGPKGRNVVLEQSFGAPKVTKDGVTVAKSIEFKDRVKNIGASLVKQVANATNDVAGDGTTCATVLTRAIFVEGCKSVAAGMNAMDLRRGITMAVDAVVTNLKSRARMISTSEEIAQVGTISANGEREIGELIAKAMEKVGKEGVITIADGKTLYNELEVVEGMKLDRGYISPYFITNQKNQKCELENPLILIHEKKISNLPALVKFLELSLTKQRPLLIVAEDLESEALATLILNKLRAGIKVCAIKAPAFGENRKAGLQDLAALTGGEVITEELGLDIEKVGAEVLGSCKKVTVSKDDTIILDGAGDKATIEERCDQIRSAIESSTSDYDKDKLQER…	heat shock protein 60 [Prunus dulcis]	Chaperonin CPN60, mitochondrial OS=Arabidopsis thaliana GN=CPN60 PE=1 SV=2	Chaperonin GroEL (HSP60 family)	Posttranslational modification, protein turnover, chaperones ;	K04077|1|0.0|1016|rcu:RCOM_1023530|chaperonin GroEL	GO:0042026//protein refolding;GO:0009408//response to heat;GO:0046686//response to cadmium ion	GO:0005524//ATP binding;GO:0051082//unfolded protein binding	GO:0005759//mitochondrial matrix;GO:0009507//chloroplast;GO:0022626//cytosolic ribosome;GO:0005886//plasma membrane
	Gorai.007G175100.1|PACid:26785053	1.04±0.08	1.76±0.28	0.97±0.08	2.02±0.14	180	30610	MVVKVYGPAFASPKRVIACLIEKEIEFETVPVDLLKGEHKDPEFLKLQPFGTVPVTEDGDYVLYESRAIIRYYAEKYKSQGTDLLGKTVEERGQVENWLEVEAHNFNPPIYALTLHLMFASKMGFPPDENLIKESEEKLGKVLDIYEERLSKNKYLAGDFFSLADLSHLPFTQYLVGQMGKEYMITSRKHVSAWWDDISSRPSWQKVLQLYAPPF	glutathione-s-transferase theta, gst, putative [Ricinus communis] >gi|223530281|gb|EEF32179.1| glutathione-s-transferase theta, gst, putative [Ricinus communis]	Glutathione S-transferase F9 OS=Arabidopsis thaliana GN=GSTF9 PE=1 SV=1	Glutathione S-transferase	Posttranslational modification, protein turnover, chaperones ;	K00799|1|4e-100|361|rcu:RCOM_0324140|glutathione S-transferase [EC:2.5.1.18]	-	-
	Gorai.009G397800.1|PACid:26762368	0.91±0.04	1.37±0.11	1.01±0.07	1.44±0.03	1010	35280	MACSATSSAAALISSKPRAFSSNSKPFSQSLSLPNPFTGLPAPLLSRPASFSLSRASPSRKSFVVKATSELPLVGNPAPDFEAEAVFDQEFIKVKLSEYIGKKYVILFFYPLDFTFVCPTEITAFSDRYEEFEKLNTEILGVSIDSVFSHLAWVQTDRKSGGLGDLKYPLISDVTKTIAKAYGVLIPDQGIALRGLFIIDKEGIIQHSTINNLAIGRSVDETMRTLQALQYVQENPDEVCPAGWKPGEKSMKPDPKLSKDYFAAI	putative 2-cys peroxiredoxin [Lemna minor]	2-Cys peroxiredoxin BAS1, chloroplastic OS=Arabidopsis thaliana GN=BAS1 PE=1 SV=2	Peroxiredoxin	Posttranslational modification, protein turnover, chaperones ;	K03386|1|2e-120|429|pop:POPTR_576525|peroxiredoxin (alkyl hydroperoxide reductase subunit C) [EC:1.11.1.15]	GO:0009409//response to cold;GO:0055114//oxidation-reduction process	GO:0004601//peroxidase activity;GO:0051920//peroxiredoxin activity	GO:0009941//chloroplast envelope;GO:0010319//stromule;GO:0009570//chloroplast stroma;GO:0009579//thylakoid;GO:0048046//apoplast
	Gorai.009G182500.1|PACid:26763009	1.15±0.10	2.01±0.24	1.03±0.11	1.37±0.09	780	43064	MATVSQLNNFPCKTFLITPQNSNFTSKLPVLPLNSTKPTQNSIKKSQFLTQKSVQPRPVFQVRASDADDEWGPDKEEPVVIESPGVAVAEEKKPDDAGEIESLKKALVDSFYGTDRGLKASSETRAEIVELITQLEAKNPTPAPTEALPLLNGKWILKYTSFPGLFPLLSRGQFPLVKVEEISQTIDAESLTVQNSVQFAGPLASSSISTSAKFEVRSPKRVQIKFQEGIIGTPQLTDSIVLPENVEFLGQKIDLTPIKGLLTSVQDTASSVAKTISSQPPLKIPLSNSNAESWLLTTYLDDELRISRGDAGSVFVLVKEGSALLN	putative plastid lipid-associated protein [Vitis hybrid cultivar]	Plastid-lipid-associated protein, chloroplastic OS=Citrus unshiu GN=PAP PE=2 SV=1	-	-	-	GO:0009409//response to cold;GO:0009737//response to abscisic acid stimulus;GO:0010205//photoinhibition	GO:0005515//protein binding;GO:0032440//2-alkenal reductase activity;GO:0005198//structural molecule activity	GO:0009535//chloroplast thylakoid membrane;GO:0010287//plastoglobule;GO:0005634//nucleus;GO:0010319//stromule
	Gorai.007G285000.1|PACid:26782445	1.06±0.20	1.53±0.03	1.04±0.19	1.43±0.15	253	40559	MADSATASSPLKVIAGADSFGAELKDAMVSHLRSLNIEVEDLGITSYYNIGAEVGRRVSSATTSPSVETRGLLACGTGVGVGIFANKFPGVFASTCLTPDEARNNRSINNCNVLALSGMSTSADTAKEIVDTWLNTPFKAPCPASKSQPWPEEISNFFDESMNEMPKIGASENTQAETCAVCCLVKNRELNPIDIIPGGSMKILRESPTSAIIKFKAGSVEPAHHHTFGHCLLVMKGKKSVWNLSKKERYDLGDGDYLFTPAGDVHRVKYYEDTEFFLKWDGKWDIFFDEDLETAKIAIEKELANGSA	putative DNA-damage-repair/toleration protein DRT102 [Trifolium pratense]	DNA-damage-repair/toleration protein DRT102 OS=Arabidopsis thaliana GN=DRT102 PE=2 SV=2	Ribose 5-phosphate isomerase RpiB	Carbohydrate transport and metabolism ;	-	GO:0000719//photoreactive repair;GO:0009409//response to cold;GO:0009411//response to UV	-	GO:0005634//nucleus;GO:0005829//cytosol
	Gorai.004G142700.1|PACid:26776845	1.03±0.16	1.60±0.20	1.09±0.03	1.23±0.03	387	106264	MANPKLGRSPSMRDRVEDTLSAHRNELVALLSRYVAQGKGILQPHTLIDELENVVGDDKAREKLSDGPFSEVLKSAQEAIILPPYVAIAIRPRPGVWEYVRVNVHELSVEQLDVSEYLRFKEALADVREDNHFLLELDFEPFNASFPRPNRSSSIGNGVQFLNRHLSSNMFRNKDSLEPLLNFLRAHKYKGHALMLNDRIQSIPRLQAALAKAEDHLAKLSSDAPYSEFEYELQGMGFERGWGDTAAHVLETMHLLLDILQAPDPSILETFLGRVPMVFNVVILSPHGYFGQANVLGLPDTGGQVVYILDQVRALENEMLLRIKRQGLDITPRILIVTRLIPDAKGTSCNQRLERVSGTEHTHILRVPFRSEHGVLRKWISRFDVWPFLETYAEDVASE…	sucrose synthase [Gossypium raimondii]	Sucrose synthase 2 OS=Pisum sativum GN=SUS2 PE=2 SV=1	Glycosyltransferase	Cell wall/membrane/envelope biogenesis ;	K00695|1|0.0|1473|vvi:100267606|sucrose synthase [EC:2.4.1.13]	GO:0009058//biosynthetic process;GO:0005985//sucrose metabolic process	-	-
	Gorai.005G181700.1|PACid:26805041	1.09±0.20	1.74±0.19	1.11±0.11	1.23±0.05	675	80921	MAESSNNVVETINRDCHDFKSLLSSSDRDFLVRNNGDQVKIDSLKGKKLGLYFSASWCGPCRRFTPNLIEVYTELSTKGDFEVIFVSADEDEESFNGYFSKMPWLAIPFSDSEARKRLDEPFSVKGIPHLVLLDENGKVLTEEGVEIIREYGEEGYPFTPEKIQELKDLEEKAKKEQSIKTILVSRSRDFVVTSDGSKVPVSELEGKTVGIYFSASSFKPSADFTQKLAEVYSKLKENGEKFEVVMISLDDDDESFKQSFGAPWLALPSKDKSCEKLARYFELSTLPTVVIIGPDGKTLHPNAADAIDEHGIVAYPFTPEKFAELKEIEKASEATQTLESVLVSGGLDFVLGKDGAKVKVADLVGKTILLYFSAHWCPPCRAFTPSLVEVYKKIKEKDD…	unnamed protein product [Vitis vinifera]	Probable nucleoredoxin 1 OS=Arabidopsis thaliana GN=At1g60420 PE=1 SV=1	Thiol-disulfide isomerase and thioredoxins	Posttranslational modification, protein turnover, chaperones ; Energy production and conversion ;	-	GO:0055114//oxidation-reduction process;GO:0045454//cell redox homeostasis;GO:0080092//regulation of pollen tube growth;GO:0010183//pollen tube guidance;GO:0046686//response to cadmium ion	GO:0047134//protein-disulfide reductase activity;GO:0016209//antioxidant activity	-
	Gorai.001G109800.1|PACid:26824421	1.09±0.12	1.29±0.04	1.11±0.15	1.24±0.07	227	63882	MAPIKGILSLQRAAMFRASSERWKLGIRSFSTQGATTAGAPQAPPPPPPPEKTHFGGLKDEDRIFTNLYGLHDPFLKGAMKRGDWYRTKDLVLKGADWIVNEMKKSGLRGRGGAGFPSGLKWSFMPKVSDGRPSYLVVNADESEPGTCKDREIMRHDPHKLLEGCLIAGVGMRATAAYIYIRGEYVNERKNLERARKEAYEAGLLGKNACGSGYDFDVHIHFGAGAYICGEETALLESLEGKQGKPRLKPPFPANAGLYGCPTTVTNVETVAVSPTILRRGPEWFASFGRKNNSGTKLFCVSGHVNKPCTVEEEMSIPLKELIERHCGGIRGGWDNLLAVIPGGSSVPLLPKHICDDVLMDYDALKAVQSGLGTAAVIVMDKSTDVVDAIARLSYFYKH…	esterase/lipase/thioesterase [Populus tremula] >gi|190895702|gb|ACE96364.1| esterase/lipase/thioesterase [Populus tremula] >gi|190895708|gb|ACE96367.1| esterase/lipase/thioesterase [Populus tremula] >gi|190895710|gb|ACE96368.1| esterase/lipase/thioesterase [Populus tremula] >gi|190895714|gb|ACE96370.1| esterase/lipase/thioesterase [Populus tremula] >gi|190895716|gb|ACE96371.1| esterase/lipase/thi…	NADH dehydrogenase [ubiquinone] flavoprotein 1, mitochondrial OS=Arabidopsis thaliana GN=At5g08530 PE=2 SV=1	NADH:ubiquinone oxidoreductase, NADH-binding (51 kD) subunit	Energy production and conversion ;	K03942|1|0.0|887|rcu:RCOM_1080980|NADH dehydrogenase (ubiquinone) flavoprotein 1 [EC:1.6.5.3 1.6.99.3]	GO:0006511//ubiquitin-dependent protein catabolic process;GO:0016049//cell growth;GO:0051788//response to misfolded protein;GO:0000902//cell morphogenesis;GO:0080129//proteasome core complex assembly;GO:0006120//mitochondrial electron transport, NADH to ubiquinone;GO:0006499//N-terminal protein myristoylation;GO:0048193//Golgi vesicle transport;GO:0009853//photorespiration	GO:0008137//NADH dehydrogenase (ubiquinone) activity;GO:0051539//4 iron, 4 sulfur cluster binding;GO:0010181//FMN binding	GO:0005747//mitochondrial respiratory chain complex I
	Gorai.010G170600.1|PACid:26760064	1.14±0.07	1.43±0.06	0.90±0.08	1.23±0.05	960	30854	MSLTIPTNLSKSLLKPKINSQLTPKVSRSLVVCSTDKTSSPPSSASPLQAFSAALALSSILLSAPQPAVADIAGLTPCKESKQFAKREKQQIKKLESSLKLYAPDSAPALAIKATIEKTKRRFDNYGKYGLLCGSDGLPHLIVSGDQRHWGEFITPGLLFLYIAGWIGWVGRSYLIAISDDKKPAMKEIIIDVPLATGLIFRGFIWPVAAYRELINGDLVVKDV	putative chloroplast photosystem I subunit III precursor [Populus x canadensis]	Photosystem I reaction center subunit III, chloroplastic OS=Flaveria trinervia GN=PSAF PE=2 SV=1	-	-	K02694|1|2e-92|336|pop:POPTR_709002|photosystem I subunit III	GO:0019344//cysteine biosynthetic process;GO:0015979//photosynthesis	-	GO:0009941//chloroplast envelope;GO:0009543//chloroplast thylakoid lumen;GO:0009538//photosystem I reaction center;GO:0009535//chloroplast thylakoid membrane
	Gorai.008G294300.1|PACid:26818701	1.09±0.05	1.28±0.08	1.12±0.18	1.59±0.28	440	69332	MAARRISSLLTRSLSVSSSSVSTSLFSSLGKNSGRNGIGKRFSTAAALEDLIVPPVQIAYTQNLIDGKFVDAASGKTFPTYDPRTGDVIANVAEGDAEDIDRAVAAARKAFDEGPWPKMTPYERSRIMLRFADLVEKHSEELAALETWNNGKPHEQSAKSELPMFIRLFHYYAGWADKIHGLTVPADGPHHVQTLHEPIGVAGQIIPWNFPLIMFAWKVGPALACGNTIVLKTAEQTPLTALYVAKLFHEAGLPPGVLNVVSGYGPTAGAALASHMDVDKVAFTGSTDTGKIVLELAAKSNLKPVTLELGGKSPFIICEDADVDKAVELAHFALFFNQGQCCCAGSRTFVHERVYDEFLEKAKARALRRVVGDPFRKGVEQGPQIDTEQFEKVLRYIRA…	unknown [Medicago truncatula]	Aldehyde dehydrogenase family 2 member B4, mitochondrial OS=Arabidopsis thaliana GN=ALDH2B4 PE=1 SV=1	NAD-dependent aldehyde dehydrogenases	Energy production and conversion ;	K00128|1|0.0|963|gmx:100788570|aldehyde dehydrogenase (NAD+) [EC:1.2.1.3]	GO:0055114//oxidation-reduction process	GO:0005524//ATP binding;GO:0001758//retinal dehydrogenase activity	GO:0009507//chloroplast;GO:0005739//mitochondrion
6	Gorai.013G036800.1|PACid:26788271	0.63±0.13	0.56±0.04	0.90±0.08	0.55±0.12	1082	18045	MAAADVEFRCFVGGLAWATDDRALEEAFSAFGEIVESKIINDRETGRSRGFGFVTFRDEKAMRDAIEGMNGQNLDGRNITVNEAQSRRSGGGGGGFGGGNGGYSRGGGGGGGYGGRQGGYGGGRREGGYGNGGGYGGGGYGGGRREGGYGDGGSRYSRGGGASEGNWRS	glycine-rich RNA-binding protein [Gossypium hirsutum]	Glycine-rich RNA-binding protein OS=Daucus carota PE=2 SV=1	RNA-binding proteins (RRM domain)	General function prediction only ;	K13195|1|1e-35|147|pop:POPTR_712972|cold-inducible RNA-binding protein!K02965|2|7e-16|81.3|ath:AT5G47320|small subunit ribosomal protein S19!K11294|3|3e-14|75.5|smo:SELMODRAFT_15428|nucleolin!K12831|5|1e-13|73.6|gmx:100792707|splicing factor 3B subunit 4	-	GO:0000166//nucleotide binding	-
	Gorai.007G309800.1|PACid:26780319	0.82±0.08	0.56±0.06	1.00±0.12	0.61±0.05	611	102184	DKRQKPVRARWRAAKPFIWEIVWPYLPHSTPPHIYSISTSLHCFSFQNISSSLKAYLLLLLLLLLNFEGEMASIHQTPSLEVSSSAANTRKITPPTPSTSRFSLPFTFKSQFNALVVGGRPLLGGFNHSSVPRAVATPNSVLSEQAFEGLSLHQEDDDVYDSEGEVESGLESESTHDDELDLSKLGLPQRLVDSLLKRGITHLFPIQRAVLVPALQGRDIIARAKTGTGKTLAFGIPIIKQITEDEGQRTRRMSGRLPRVLVLAPTRELAKQVEKEIKESASYLNTVCVYGGVSYNLQRNALSRGVDVVVGTPGRIIDLIESKDLRLGEVEYLVLDEADQMLAVGFEEAVEEILENLPSKRQSMLFSATMPSWVKKLARKYLDNPLNIDLVGDRDEKLA…	DEAD-box ATP-dependent RNA helicase 3 [Arabidopsis thaliana] >gi|332006183|gb|AED93566.1| DEAD-box ATP-dependent RNA helicase 3 [Arabidopsis thaliana]	DEAD-box ATP-dependent RNA helicase 3, chloroplastic OS=Oryza sativa subsp. japonica GN=Os03g0827700 PE=2 SV=2	Superfamily II DNA and RNA helicases	Replication, recombination and repair ; Transcription ; Translation, ribosomal structure and biogenesis ;	K12823|1|1e-72|273|aly:ARALYDRAFT_477362|ATP-dependent RNA helicase DDX5/DBP2 [EC:3.6.4.13]	GO:0009793//embryo development ending in seed dormancy	GO:0008270//zinc ion binding;GO:0008026//ATP-dependent helicase activity;GO:0005524//ATP binding	GO:0009941//chloroplast envelope;GO:0009570//chloroplast stroma;GO:0016020//membrane;GO:0005634//nucleus
	Gorai.013G014300.1|PACid:26791055	0.72±0.06	0.80±0.07	1.01±0.02	0.76±0.10	186	33794	MGAVNVANKDINVSLAEKKPRVVFVLGGPGSGKGTQCANIVEHFHYTHLSAGDLLRAEIKSGSENGTMIQNMIKEGKIVPSEVTIKLLEKAMLESGNDKFLIDGFPRNEENRAAFEAVTKIEPEFVLFFNCPEEEMEKRLLSRNQGREDDNIETIRKRFKVFLDSSLPVIEYYKAKGKVREIEAAKPIGEVFEAVKVVFTPKAEKVKKSIGLSLFTLETNRASSTHGRYALHIQVVA	unknown [Populus trichocarpa]	UMP/CMP kinase OS=Arabidopsis thaliana GN=PYR6 PE=1 SV=1	Adenylate kinase and related kinases	Nucleotide transport and metabolism ;	K13800|1|1e-98|356|gmx:100306603|UMP-CMP kinase [EC:2.7.4.- 2.7.4.14]	GO:0046939//nucleotide phosphorylation;GO:0009173//pyrimidine ribonucleoside monophosphate metabolic process;GO:0009165//nucleotide biosynthetic process	GO:0004017//adenylate kinase activity;GO:0004849//uridine kinase activity;GO:0004127//cytidylate kinase activity;GO:0005524//ATP binding;GO:0009041//uridylate kinase activity;GO:0046899//nucleoside triphosphate adenylate kinase activity	GO:0005634//nucleus;GO:0048046//apoplast
	Gorai.003G177300.1|PACid:26798452	0.76±0.11	0.94±0.07	1.24±0.15	1.17±0.04	434	33143	MASQVLPQALHMIPRNQVQPFNPVKNRGFSAFLSRGPSPLTTSKVSVSGFHSKVPVGSSFSCFARRGFVVRAESNPEGEGEAERNENGVEEPETKAEAEVEGEGEGEGEDEAEEEKPKEPRKPRIKLGDIMGILNKRAIEASDKERPTPDLRTGDIVEIKLEVPENRRRLSVYKGIVISKQNAGIHTTIRIRRIIAGIGVEIVFPVYSPNIKEIKVVKHRKVRRARLYYLRDKLPRLSTFK	hypothetical protein VITISV_037813 [Vitis vinifera]	50S ribosomal protein L19-2, chloroplastic OS=Arabidopsis thaliana GN=At5g47190 PE=2 SV=1	Ribosomal protein L19	Translation, ribosomal structure and biogenesis ;	-	GO:0044260//cellular macromolecule metabolic process;GO:0010467//gene expression;GO:0009791//post-embryonic development;GO:0050896//response to stimulus;GO:0048608//reproductive structure development;GO:0071841//cellular component organization or biogenesis at cellular level;GO:0044238//primary metabolic process;GO:0044249//cellular biosynthetic process	-	GO:0044434//chloroplast part;GO:0030529//ribonucleoprotein complex
	Gorai.001G180600.1|PACid:26819998	0.74±0.08	1.18±0.16	1.26±0.13	1.20±0.10	800	11875	MTGAFAHGAIFFIRDYNPEQNEDNVLARMLDHKEAIISHLSWASLFLGFHTLGLYVHNDVMLAFGTPEKQILIEPIFAQWIQSAHGKTSYGFDL	photosystem I subunit B [Tolumnia compressicaulis]	Photosystem I P700 chlorophyll a apoprotein A2 OS=Solanum bulbocastanum GN=psaB PE=3 SV=1	-	-	K02690|1|2e-50|195|gmx:3989267|photosystem I P700 chlorophyll a apoprotein A2	GO:0018298//protein-chromophore linkage;GO:0015979//photosynthesis;GO:0022900//electron transport chain	GO:0009055//electron carrier activity;GO:0000287//magnesium ion binding;GO:0016168//chlorophyll binding;GO:0051539//4 iron, 4 sulfur cluster binding	GO:0016021//integral to membrane;GO:0009522//photosystem I;GO:0009535//chloroplast thylakoid membrane
	Gorai.011G197500.1|PACid:26808027	0.51±0.07	0.73±0.05	1.26±0.16	1.16±0.26	528	21545	MGVVTYDYENTSPVAPARLFKAFTVEAPKVWPTAAPNAVKSLEVEANPSSGSIVKINFVEGLPFQYMKHQIGGHDESSFSYSYDLIEGGPLGDKLEKISYENKFEAAAGGGSICKSSMKFYTVGDNVITEDEIKALIKGSEGVYKPVEAYLLANPEACN	PR protein class 10 [Gossypium hirsutum]	Pathogenesis-related protein STH-2 OS=Solanum tuberosum GN=STH-2 PE=2 SV=1	-	-	-	GO:0006952//defense response	-	-
	Gorai.011G000800.2|PACid:26812332	0.90±0.13	0.82±0.11	1.21±0.12	0.90±0.02	1870	87692	MEDSVLLREWFDRVDSGKTGSITATQLKSAFAIGNLNFPLSVVQQMIRMYDFDRNGTMSFEEFLALNKFLVKVQQAFSDLERNRGFLATNDVYEAISKIGFVLDSPAFYTACESFDQKKNGRLHLDDFISLCIFLQSARNMFNAFDTGKQGRVTLDLNQFVYCTMASRMVSVPAVQTHISLDFETFVFKKEKVSLAGQDEYIVRGGRDLFKLLPDAFKGIKQIGVIGWGSQGPAQAQNLRDSLADAKSDIIVKVGLRKGSRSFDEARAAGFSEENGTLGDIWETISGSDLVLLLISDAAQADNYEKIFSYMKPNSILGLSHGFLLGHLQSKGLDFPKNISVIAVCPKGMGPSVRRLYVQGREINGAGINSSFGVHQDVDGRATDVALGWSVALGSPFTF…	unknown [Zea mays]	Ketol-acid reductoisomerase, chloroplastic OS=Arabidopsis thaliana GN=At3g58610 PE=2 SV=2	Ketol-acid reductoisomerase	Amino acid transport and metabolism ; Coenzyme transport and metabolism ;	K00053|1|0.0|982|rcu:RCOM_1014850|ketol-acid reductoisomerase [EC:1.1.1.86]	GO:0055114//oxidation-reduction process;GO:0006164//purine nucleotide biosynthetic process;GO:0009651//response to salt stress;GO:0006096//glycolysis;GO:0006094//gluconeogenesis;GO:0009082//branched chain family amino acid biosynthetic process;GO:0046686//response to cadmium ion	GO:0005507//copper ion binding;GO:0004455//ketol-acid reductoisomerase activity;GO:0000166//nucleotide binding;GO:0016853//isomerase activity;GO:0050662//coenzyme binding	GO:0005618//cell wall;GO:0005739//mitochondrion;GO:0009941//chloroplast envelope;GO:0009570//chloroplast stroma;GO:0048046//apoplast
	Gorai.013G032400.1|PACid:26789797	0.84±0.03	0.61±0.06	0.97±0.07	1.31±0.02	3442	51139	MASASATLLKSSPIIDKSEWIKGQNLRHPSVCFVRSHPTSVAFTVRASSYADELVKTAKTVASPGRGILAMDESNATCGKRLASIGLENTEANRQAYRTLLVSAPGLGDYISGAILFEETLYQSTIDGKKMVDVLVEQKIVPGIKVDKGLVPLPGSNNESWCQGLDGLSSRTAAYYQQGARFAKWRTVVSIPNGPSALAVKEAAWGLARYAAISQDSGLVPIVEPEILLDGDHGIDRTFEVAQKVWAEVFFYLAENNVMFEGILLKPSMVTPGAECKDKATPQQVADYTLKLLHRRIPPAVPGIMFLSGGQSEVEATLNLNAMNQSPNPWHVSFSYARALQNTCLKTWGGRPENVKAAQDALLVRAKANSLAQLGKYTGEGESEEAKKGMFVKGYVY	chloroplast aldolase, partial [Nicotiana attenuata]	Fructose-bisphosphate aldolase 2, chloroplastic OS=Pisum sativum PE=1 SV=2	Fructose-1,6-bisphosphate aldolase	Carbohydrate transport and metabolism ;	K01623|1|0.0|746|vvi:100852851|fructose-bisphosphate aldolase, class I [EC:4.1.2.13]	GO:0046686//response to cadmium ion;GO:0009737//response to abscisic acid stimulus;GO:0006096//glycolysis	GO:0004332//fructose-bisphosphate aldolase activity	GO:0009941//chloroplast envelope;GO:0022626//cytosolic ribosome;GO:0031977//thylakoid lumen;GO:0016020//membrane;GO:0048046//apoplast
	Gorai.002G254000.1|PACid:26792192	0.87±0.03	1.20±0.03	1.23±0.23	0.93±0.12	1046	23855	MDAGSKVKKGAGGRKGGGPKKKPVSRSVKAGLQFPVGRIGRYLKKGRYSQRVGTGAPVYLAAVLEYLAAEVLELAGNAARDNKKNRIIPRHVLLAVRNDEELGKLLAGVTIAHGGVLPNINPVLLPKKNEKAAAKEPKSPSKATKSPKKSPKKA	histone H2A [Citrus trifoliata]	Probable histone H2A.6 OS=Oryza sativa subsp. japonica GN=Os05g0113900 PE=2 SV=2	Histone H2A	Chromatin structure and dynamics ;	K11251|1|7e-39|157|vvi:100265411|histone H2A	GO:0006334//nucleosome assembly	GO:0003677//DNA binding	GO:0005634//nucleus
	Gorai.006G089700.1|PACid:26833911	0.82±0.08	1.12±0.06	1.32±0.08	1.32±0.09	1232	26135	MASEKKLSNPMREIKVQKLVLNISVGESGDRLTRAAKVLEQLSGQTPVFSKARYTVRSFGIRRNEKIACYVTVRGEKAMQLLESGLKVKEYELLRRNFSDTGCFGFGIQEHIDLGIKYDPSTGIYGMDFYVVLERAGYRVGRRRRCKSRVGIQHRVTKEDSMKWFQVKYEGVILNKSQNIGA	putative ribosomal protein [Gossypium hirsutum] >gi|49333392|gb|AAT64031.1| putative ribosomal protein [Gossypium hirsutum] >gi|188509965|gb|ACD56649.1| putative ribosomal protein [Gossypioides kirkii]	60S ribosomal protein L11-1 OS=Arabidopsis thaliana GN=RPL11A PE=1 SV=2	Ribosomal protein L5	Translation, ribosomal structure and biogenesis ;	K02868|1|9e-90|327|rcu:RCOM_1250160|large subunit ribosomal protein L11e	GO:0006412//translation	GO:0003735//structural constituent of ribosome	GO:0005730//nucleolus;GO:0009506//plasmodesma;GO:0009507//chloroplast;GO:0005773//vacuole;GO:0016020//membrane;GO:0022625//cytosolic large ribosomal subunit;GO:0005794//Golgi apparatus
	Gorai.009G203100.1|PACid:26763606	0.87±0.06	0.73±0.03	1.34±0.12	0.71±0.05	2104	28934	MAGTLGAISSWVPKIPALFLYNNNRCASRSLVFKPVCWNRPSVFSTSPRSLLTMAQADQISNSPEIKEPSPKVPKLGQNGVHEVTHGPASLLKVKKLSEKAVLPSRGSPLAAGYDLSSATDTKVPARGKALIPTDLSIAIPEGTYGRVAPRSGLAWKHSIDVGAGVIDADYRGPLGVILFNHSDVDFEVKVGDRISQLIIEKIMTPDVLEVDDLDSTTRGAGGFGSTGV	hypothetical protein SELMODRAFT_232059 [Selaginella moellendorffii] >gi|300158935|gb|EFJ25556.1| hypothetical protein SELMODRAFT_232059 [Selaginella moellendorffii]	Deoxyuridine 5'-triphosphate nucleotidohydrolase OS=Arabidopsis thaliana GN=DUT PE=1 SV=1	dUTPase	Nucleotide transport and metabolism ;	K01520|1|7e-83|304|vvi:100253119|dUTP pyrophosphatase [EC:3.6.1.23]	GO:0006281//DNA repair;GO:0006261//DNA-dependent DNA replication;GO:0006226//dUMP biosynthetic process;GO:0046080//dUTP metabolic process	GO:0004170//dUTP diphosphatase activity;GO:0042802//identical protein binding;GO:0000287//magnesium ion binding	-
	Gorai.013G159800.1|PACid:26786364	0.90±0.14	0.69±0.08	0.75±0.02	0.71±0.05	516	25385	MAWCSLRSIHVPTVDVGLLRTRSPLAAVGGVVAGSSFLRSSSRNGSPFACLSLSTSPGNKRKTIRIKEAVATDKAPAALGPYSQAIKANNLLFVSGVLGLIPETGKFISDSVEDQTEQVLKNMGEILKASGADYSSVVKTTIMLADLKDFKKVNEIYAKYFPSPAPARSTYQVAALPLDAKIEIECIAALKA	hypothetical protein VITISV_026634 [Vitis vinifera]	RutC family protein C23G10.2 OS=Caenorhabditis elegans GN=C23G10.2 PE=2 SV=3	Putative translation initiation inhibitor, yjgF family	Translation, ribosomal structure and biogenesis ;	-	GO:0009651//response to salt stress;GO:0006096//glycolysis;GO:0006094//gluconeogenesis;GO:0046686//response to cadmium ion;GO:0019761//glucosinolate biosynthetic process	GO:0004521//endoribonuclease activity	GO:0009941//chloroplast envelope;GO:0009579//thylakoid;GO:0009570//chloroplast stroma;GO:0005773//vacuole
	Gorai.009G136600.1|PACid:26764085	0.91±0.03	0.67±0.02	1.12±0.02	0.82±0.03	4062	82123	MASSFIAMSSIGSLGFPCSKQMDKKFFNSSGRLSSFESISSSAFLGKKQKVILRRGHSSKIRAMAKELHFNTDGSAIKKLQTGVNKLADLVGVTLGPKGRNVVLESKYGSPKIVNDGVTVAKEVELEDPVENIGARLVRQAASKTNDLAGDGTTTSVVLAQGLITEGVKVVAAGASPIQISRGIEITTKALVSELKSMSKEVEDSELVDVAAVSAGNNYEVGNMIAEAMGKVGRKGIVTLEEGSSSENSLYVVEGMQFDRGYISPYFVTDSEKMAVEYENCKLLLVDKKITNARDLIHVLEEAIKGGYPIIIIAEDIEQEALATLVVNKLRGSLKIAALKAPGFGERKGQYLDDIAVLTGGTVIREEVGLSLDKAEKEVLGHAAKVVLTKETTTIVGDG…	PREDICTED: ruBisCO large subunit-binding protein subunit beta, chloroplastic [Vitis vinifera] >gi|297743227|emb|CBI36094.3| unnamed protein product [Vitis vinifera]	RuBisCO large subunit-binding protein subunit beta, chloroplastic OS=Pisum sativum PE=1 SV=2	Chaperonin GroEL (HSP60 family)	Posttranslational modification, protein turnover, chaperones ;	K04077|1|0.0|915|bdi:100842360|chaperonin GroEL	GO:0008219//cell death;GO:0051085//chaperone mediated protein folding requiring cofactor;GO:0009409//response to cold;GO:0016117//carotenoid biosynthetic process;GO:0009627//systemic acquired resistance;GO:0009658//chloroplast organization;GO:0048481//ovule development	GO:0005524//ATP binding;GO:0051082//unfolded protein binding	GO:0005739//mitochondrion;GO:0005730//nucleolus;GO:0009941//chloroplast envelope;GO:0009570//chloroplast stroma;GO:0022626//cytosolic ribosome;GO:0005794//Golgi apparatus;GO:0005886//plasma membrane;GO:0010319//stromule;GO:0048046//apoplast
	Gorai.008G010800.1|PACid:26815997	0.91±0.10	1.22±0.06	1.23±0.07	1.20±0.06	693	33899	MASRSCLYVVLLLLAFQSTVIKATVPVVPPQCRPVPAGTLARIEFLANLVIGVAEFFLRSSNGTGIEDIAPGLVQGPVPIGATLATLDNATRAAVRQFGLALVGNLRAIVNVTSLRAPLPRPQLNFTAGVFANILNLSALTPPFNVYGGQTQFFLVAEPLTSSLIQYYLAQVIPSIAGIPQQQLVTGIGLNAAAQHGYFRTRLNAIVNITVPPYTITVASFTNTTATAVNLLGLCGVKNEGLIVPLPLGAENRTTTNVIPGDVNSLSPRRTERETLRILHGTGNATRPGGIFPSGPNGTLYRLVIVPLRLS	unknown [Zea mays]	Desiccation-related protein PCC13-62 OS=Craterostigma plantagineum PE=2 SV=1	-	-	-	-	-
	Gorai.010G073800.1|PACid:26759368	0.92±0.06	0.81±0.06	0.78±0.03	0.81±0.01	3426	145015	MTPVIPCSVSNITFIPGAACTVRKNTSLTGCSSSRKHTRYALPSQRFILPLSTSVTSFRKYGTGYALHGKLGICLSTAGTDVAVEESDSSVTKVSSGGSEIPSDAVETSENTTSQPDSTPPTQSKRARPVRKSEMPPVKNEELIPGAMFTGKVRSIQPFGAFVDFGAFTDGLVHVSRLSNSFVKDVASFVSVGQEVQVRLVEVNTESGRISLSMRENDDASKRLPRKDGPASTDKARSSRKNASKSSSKKDFKSSKFVKGQELDGTVKNLTRSGAFISLPEGEEGFLPQSEEADDGLMSMMGNSSLQIGQEVKVRVLRITRGQVTLTMKKEEDDDKLDSQLSQGVVYAATNPFMLAFRKNKEIAAFLDQREKAEKVEVQPAANVETTTVSTAVDETVVK…	elongation factor ts, putative [Ricinus communis] >gi|223546719|gb|EEF48217.1| elongation factor ts, putative [Ricinus communis]	Elongation factor Ts OS=Prochlorococcus marinus (strain MIT 9515) GN=tsf PE=3 SV=1	Translation elongation factor Ts	Translation, ribosomal structure and biogenesis ;	K02357|1|0.0|1239|vvi:100262932|elongation factor Ts	GO:0042744//hydrogen peroxide catabolic process;GO:0016117//carotenoid biosynthetic process;GO:0009793//embryo development ending in seed dormancy;GO:0019288//isopentenyl diphosphate biosynthetic process, mevalonate-independent pathway;GO:0009902//chloroplast relocation;GO:0006414//translational elongation;GO:0034660//ncRNA metabolic process;GO:0046686//response to cadmium ion;GO:0010027//thylako…	GO:0003746//translation elongation factor activity	GO:0009570//chloroplast stroma
	Gorai.012G114400.1|PACid:26826587	0.96±0.03	0.81±0.03	0.79±0.01	0.86±0.04	1563	44720	MALAPTTYPSYLCSNTCSPLHRATQPLLSSTRHVGVRFNSKCSASFCSGKEQLKPWILVAKASDGESQTTEQEEQQYEEYEVEIEQPYGLKFRKGRDGGTYIDAIQPGGAADKAGVFTVGDKVLATSAVFGTEIWPAAEYGRTMYTIRQRIGPLLMKMQKRYGKVDEGGELTEKEIIRAERNSGVISDRVREIQMQNYMRKKEQKERRETDLREGLQLYKSGNYEQALEKFESVLGSKPEPNEAAVASYNVACCYAKLNQIQAGLSALEDALEAGFEDFKRIRTDPDLANLKNSEQFEPLLKRFDESFINENAINAIKSLFGIFNQK	unnamed protein product [Vitis vinifera]	-	-	-	-	GO:0009611//response to wounding;GO:0016117//carotenoid biosynthetic process;GO:0010264//myo-inositol hexakisphosphate biosynthetic process;GO:0015979//photosynthesis	-	GO:0009570//chloroplast stroma;GO:0009535//chloroplast thylakoid membrane
	Gorai.009G394200.1|PACid:26764851	1.00±0.04	0.81±0.06	0.88±0.01	0.71±0.06	496	39528	MSAPTLSMAAGVAAVSSSLYNNTKPSSLFSSSIHFLPSRLSSKQLKPSNLKTQSLNSLPLSPNLSLPRLPCFSAAFDSFQVNEDDQSSGEEYSETETQDLEEQRQQEEAEEDKVSESGGEEGKLYVGNLSYSMTSSELTEIFSEAGSVAKVEIVYDRVTDRSRGFGFVTMGSVDEAKEAIRLFDGSQVGGRTVKVNFPEVPRGGEREVMGPRIRRSYTSFIDSPYKIYAGNLGWRVTSEGLRDAFASQPGLLSAKVIYEKDTGRSRGFGFISFESAETVESALTAMNGVEVEGRPLRLNMAADRAPRTHLPAENSLESSELVSGVTV	unnamed protein product [Vitis vinifera]	33 kDa ribonucleoprotein, chloroplastic OS=Nicotiana sylvestris PE=1 SV=1	RNA-binding proteins (RRM domain)	General function prediction only ;	K11294|1|4e-32|136|smo:SELMODRAFT_15428|nucleolin!K13126|2|2e-19|94.4|ppp:PHYPADRAFT_108547|polyadenylate-binding protein!K12831|5|2e-19|94.4|gmx:100791039|splicing factor 3B subunit 4	GO:0016226//iron-sulfur cluster assembly;GO:0019288//isopentenyl diphosphate biosynthetic process, mevalonate-independent pathway;GO:0010027//thylakoid membrane organization;GO:0010228//vegetative to reproductive phase transition of meristem;GO:0048481//ovule development;GO:0009793//embryo development ending in seed dormancy	GO:0000166//nucleotide binding	GO:0009579//thylakoid;GO:0009570//chloroplast stroma;GO:0030529//ribonucleoprotein complex
	Gorai.005G124600.1|PACid:26803827	1.03±0.05	0.60±0.03	0.74±0.12	0.74±0.15	719	46110	MAANSQIFTGLTLPFKPIASSSSSSSSSSNSTCIRCLVKKPLTSFFNGGVAALKITSIRTLPGGSHSRRGGAGAIGTRMNLFDRFARVVKSYANALLSSVEDPEKILEQAVIEMNDDLVKMRQATAQVLASQKRLENKYKAAQQASEDWYRKAQLALQKGEEDLAREALKRRKSYADNASSLKAQLDQQKSVVENLVSNTRLLESKIQEAKSKKDTLKARAQTARTATKVNEMVGNVNTSNALSAFEKMEEKVMAMESEAEALGQLTTDDLEGKFALLESTSVDDDLANLKKELSGSSQKGELPPGRSTNPKLPYRDAEIETELNELRQRAKEF	Membrane-associated 30 kDa protein [Medicago truncatula] >gi|355507887|gb|AES89029.1| Membrane-associated 30 kDa protein [Medicago truncatula]	Probable membrane-associated 30 kDa protein, chloroplastic OS=Oryza sativa subsp. japonica GN=Os01g0895100 PE=1 SV=1	Phage shock protein A (IM30), suppresses sigma54-dependent transcription	Transcription ; Signal transduction mechanisms ;	K03969|1|5e-126|448|gmx:100818209|phage shock protein A	GO:0016050//vesicle organization;GO:0010027//thylakoid membrane organization	-	GO:0009508//plastid chromosome;GO:0009570//chloroplast stroma;GO:0009535//chloroplast thylakoid membrane
	Gorai.002G143400.2|PACid:26793625	1.07±0.10	0.68±0.07	0.79±0.07	0.95±0.01	465	26573	MSGAGKKVVDVAFKAGKSIDWEGMAKLLVSDEARKEFATLRRTFDEVNSTLQTKFSQEPEPIDWEYYRKGIGSRLVDMYKEAYESVEIPKFVDTVTPQFKPKFDALLVELKEAEEKSLKESERLEKEIADVQELKQKISTMTADEYFEKHPELKKKFDDEIRNDNWGY	ATP synthase D chain, mitochondrial, putative [Ricinus communis] >gi|223530804|gb|EEF32668.1| ATP synthase D chain, mitochondrial, putative [Ricinus communis]	ATP synthase subunit d, mitochondrial OS=Arabidopsis thaliana GN=At3g52300 PE=1 SV=3	-	-	K02138|1|2e-72|268|rcu:RCOM_0713220|F-type H+-transporting ATPase subunit d [EC:3.6.3.14]	GO:0051788//response to misfolded protein;GO:0009853//photorespiration;GO:0009651//response to salt stress;GO:0080129//proteasome core complex assembly;GO:0006511//ubiquitin-dependent protein catabolic process;GO:0015986//ATP synthesis coupled proton transport	GO:0008270//zinc ion binding;GO:0015078//hydrogen ion transmembrane transporter activity;GO:0016787//hydrolase activity;GO:0005507//copper ion binding	GO:0022626//cytosolic ribosome;GO:0005794//Golgi apparatus;GO:0005730//nucleolus;GO:0000276//mitochondrial proton-transporting ATP synthase complex, coupling factor F(o);GO:0009535//chloroplast thylakoid membrane;GO:0005886//plasma membrane
	Gorai.002G255200.1|PACid:26795044	1.09±0.12	1.25±0.12	1.29±0.09	1.05±0.08	675	14749	MSGRGKGGKGLGKGGAKRHRKVLRDNIQGITKPAIRRLARRGGVKRISGLIYEETRGVLKIFLENVIRDAVTYTEHARRKTVTAMDVVYALKRQGRTLYGFGG	histone H4 [Allium cepa]	Histone H4 OS=Lolium temulentum PE=3 SV=2	Histones H3 and H4	Chromatin structure and dynamics ;	K11254|1|7e-41|162|mtr:MTR_2g096100|histone H4	GO:0009414//response to water deprivation;GO:0006334//nucleosome assembly	GO:0003677//DNA binding;GO:0005515//protein binding	GO:0000786//nucleosome;GO:0005739//mitochondrion;GO:0005730//nucleolus;GO:0009506//plasmodesma;GO:0005774//vacuolar membrane;GO:0009579//thylakoid;GO:0009507//chloroplast;GO:0005794//Golgi apparatus;GO:0005886//plasma membrane
	Gorai.004G138400.1|PACid:26776303	1.10±0.12	0.43±0.06	0.80±0.07	0.68±0.12	805	23830	MIIPEKNRREISKYLFQEGVCYAKKDYNLAKHPEIDVPNLQVIKLMQSFKSKEYVRETFAWMHYYWYLTNDGIEFLRTYLNLPSEIVPATLKKQAKPAGRPMGPPGDRPRGPPRFGDGERRFGDRDGYRGGPRGGGDFGDKGGAPADYQPSFRGPGTRPAFGRGGGGYGGAGPAGSAGLP	unknown [Populus trichocarpa] >gi|118489718|gb|ABK96660.1| unknown [Populus trichocarpa x Populus deltoides]	40S ribosomal protein S10 OS=Oryza sativa subsp. japonica GN=RPS10 PE=2 SV=2	Ribosomal protein S10E	Translation, ribosomal structure and biogenesis ;	K02947|1|9e-51|197|rcu:RCOM_1688110|small subunit ribosomal protein S10e	-	GO:0003677//DNA binding	GO:0005618//cell wall;GO:0022626//cytosolic ribosome;GO:0009507//chloroplast
	Gorai.004G082100.1|PACid:26773809	1.20±0.12	0.98±0.10	1.08±0.10	1.59±0.12	298	7639	MIPWDGCKVKQIASAPRTEDCVGCKRCESTCPTDFLSVRVYLWHETTRSMGLAY	PSI 9 kDa protein [Nicotiana sylvestris]	Photosystem I iron-sulfur center OS=Piper cenocladum GN=psaC PE=3 SV=1	Ferredoxin	Energy production and conversion ;	K02691|1|8e-26|113|gmx:3989360|photosystem I subunit VII	GO:0009773//photosynthetic electron transport in photosystem I;GO:0006354//transcription elongation, DNA-dependent	GO:0046872//metal ion binding;GO:0009055//electron carrier activity;GO:0016491//oxidoreductase activity;GO:0051539//4 iron, 4 sulfur cluster binding	GO:0005739//mitochondrion;GO:0016021//integral to membrane;GO:0009533//chloroplast stromal thylakoid;GO:0009535//chloroplast thylakoid membrane;GO:0005886//plasma membrane
	Gorai.004G065300.1|PACid:26775549	1.20±0.08	1.25±0.03	0.79±0.07	0.81±0.07	550	34619	MATLSSSPSPSILSSSTANPKTPYLKPPLLFFPKPLTTALTTALATTTLLLTSPPSSIASDAYNVYYGTAASAANYGGYGGNSDKKASAEYVYDVPDGWKERLVSKVEKGTNGTDSEFYNPKKRQEKEYLTFLAGFRQLAPKDVILNNLALSDVELQDLIAGADSLVSEEKKDENGQLYYVYEIDGIGKHSLIAVTCAKNKLYAHFVNAPAPEWKRDEDTLRHIHESFKTVGSSAQHLEEFSIHGHTPEFSLSKLLST	Thylakoid lumenal 19 kDa protein, chloroplast precursor, putative [Ricinus communis] >gi|223533893|gb|EEF35620.1| Thylakoid lumenal 19 kDa protein, chloroplast precursor, putative [Ricinus communis]	Thylakoid lumenal 19 kDa protein, chloroplastic OS=Arabidopsis thaliana GN=At3g63540 PE=1 SV=2	-	-	-	GO:0015979//photosynthesis	GO:0005509//calcium ion binding	GO:0009507//chloroplast;GO:0009654//oxygen evolving complex
	Gorai.005G258300.1|PACid:26801931	1.22±0.29	0.94±0.13	1.05±0.11	1.52±0.05	205	51380	MALRLPTQLATRGTFHHHHNNNSKSTMTAALSWRRTLSPDTPLIHSSTSLTTKKSYVQQMVTCSASGSTQAVNLAPGTPVRPTSILVVGSTGTLGRQIVRRALDEGYDVRCLVRPRPAPADFLRDWGATVVNADLSKPETIPATLVGIHTIIDCATGRPEEPIKTVDWEGKVALIQCAKAMGIQKYVFFSIHNCDKHPEVPLMEIKYCTEKFLQDSGLPHITIRLCGFMQGLIGQYAVPILEEKSVWGTDAPTRIAYMDTQDIARLTFIALRNEKVNGKLLTFAGPRAWTTQEVIALCERLAGQDANVTTVPVTVLRFTRQLTRFFEWTNDVADRLAFSEVLTSDTVFSAPMTETYDLLGVDAKDIVSLEKYLQDYFTNILKKLKDIKAQSKQTDIIF	hypothetical protein MTR_3g118430 [Medicago truncatula] >gi|355493143|gb|AES74346.1| hypothetical protein MTR_3g118430 [Medicago truncatula]	Uncharacterized protein ycf39 OS=Cyanophora paradoxa GN=ycf39 PE=3 SV=1	Predicted nucleoside-diphosphate-sugar epimerases	Cell wall/membrane/envelope biogenesis ; Carbohydrate transport and metabolism ;	K07748|1|5e-07|53.5|vcn:VOLCADRAFT_79975|sterol-4alpha-carboxylate 3-dehydrogenase (decarboxylating) [EC:1.1.1.170]!K00224|2|2e-06|52.0|aly:ARALYDRAFT_658933|[EC:1.3.1.-]	GO:0010114//response to red light;GO:0006364//rRNA processing;GO:0019288//isopentenyl diphosphate biosynthetic process, mevalonate-independent pathway;GO:0016117//carotenoid biosynthetic process;GO:0009637//response to blue light;GO:0010218//response to far red light	GO:0000166//nucleotide binding	GO:0009534//chloroplast thylakoid
	Gorai.010G146500.1|PACid:26758100	1.37±0.06	0.61±0.11	0.67±0.05	0.58±0.02	6487	30912	MAQAMASMAGLRGSSQAVLNGSFQLSGQTRFNIPSNNRVAVGRSGFTVRAHQTPAEPETGRRAMLGLVAAGLATGSFVQAVLADARSIKVGPPPPPSGGLPGTLNSDEPRDLVLPYKDRFFLQPLTPAQAAQRAKESAKDILGVKNLIDKKAWPYVMNDLRLKAEYLRYDLNTVIAAKPKDEKKTLKDLTKKLFSTIDDLDHAAKIKSTPEAEKSYAQTVSSLNDVLAKLG	chloroplast oxygen-evolving protein [Arachis diogoi]	Oxygen-evolving enhancer protein 3, chloroplastic OS=Spinacia oleracea GN=PSBQ PE=1 SV=1	-	-	K08901|1|8e-82|301|gmx:100306034|photosystem II oxygen-evolving enhancer protein 3	GO:0030003//cellular cation homeostasis;GO:0015979//photosynthesis;GO:0070838//divalent metal ion transport;GO:0009853//photorespiration	-	GO:0009570//chloroplast stroma;GO:0009654//oxygen evolving complex;GO:0009543//chloroplast thylakoid lumen;GO:0048046//apoplast
	Gorai.009G175700.1|PACid:26762434	1.51±0.10	1.07±0.09	0.76±0.15	0.90±0.07	5280	31291	MAQAMASMAGLRGSSQTVLEGSLRVSGQNRLNIGSSKRLGVATPGFTVRAQQAPTEPETGRRAVLGLAAAGLATGSFVQAVLADARSIKVGPPPPPSGGLPGTLNSDEPRDLNLPYKNRFYLQPLTPEQAAQRAKESAKDILGVKSLIDKKAWPYVQNDLRLKAEYLRYDLNTVISSKPKDEKKSLKELTKKLFDIIDELDHAAKIKSTPEAEKYYAETASTLNDVISKLG	oxygen evolving enhancer protein 3 [Bruguiera gymnorhiza]	Oxygen-evolving enhancer protein 3-1, chloroplastic OS=Arabidopsis thaliana GN=PSBQ1 PE=1 SV=3	-	-	K08901|1|2e-74|276|vvi:100240959|photosystem II oxygen-evolving enhancer protein 3	GO:0030003//cellular cation homeostasis;GO:0015979//photosynthesis;GO:0070838//divalent metal ion transport;GO:0009853//photorespiration	-	GO:0009523//photosystem II;GO:0009570//chloroplast stroma;GO:0009543//chloroplast thylakoid lumen;GO:0048046//apoplast
	Gorai.005G217500.1|PACid:26802512	1.71±0.13	1.18±0.05	0.87±0.07	1.31±0.21	1022	18122	MACHIFILSWHEFMISMRCYFVLTPNRIVWDSEGKEIILSTNSGQIGVLPNHAPIATAVDIGILRIRLNDQWLTMALMGGFARIGNNEITILVNDAEKGSDIDPQEAQQALEIAEANLRKAEGKRQTIEANLALRRARTRVEAINAIS	ATP synthase CF1 epsilon subunit [Gossypium hirsutum] >gi|119368505|ref|YP_913193.1| ATP synthase epsilon subunit [Gossypium barbadense] >gi|313199708|ref|YP_004021322.1| ATP synthase CF1 epsilon subunit [Theobroma cacao] >gi|325210936|ref|YP_004286010.1| ATP synthase CF1 epsilon subunit [Gossypium thurberi] >gi|372290993|ref|YP_005087699.1| atpE gene product (chloroplast) [Gossypium raimondii] >…	ATP synthase epsilon chain, chloroplastic OS=Gossypium hirsutum GN=atpE PE=3 SV=1	F0F1-type ATP synthase, epsilon subunit (mitochondrial delta subunit)	Energy production and conversion ;	K02114|1|6e-57|217|pop:Poptr_cp028|F-type H+-transporting ATPase subunit epsilon [EC:3.6.3.14]	GO:0042777//plasma membrane ATP synthesis coupled proton transport	GO:0046933//hydrogen ion transporting ATP synthase activity, rotational mechanism;GO:0005524//ATP binding;GO:0046961//proton-transporting ATPase activity, rotational mechanism	GO:0009535//chloroplast thylakoid membrane;GO:0005886//plasma membrane
	Gorai.001G128100.1|PACid:26823656	1.05±0.03	1.43±0.15	1.29±0.17	1.27±0.06	1459	20240	MADQLTDDQISEFKEAFSLFDKDGDGCITTKELGTVMRSLGQNPTEAELQDMINEVDADGNGTIDFPEFLNLMARKMKDTDSEEELKEAFRVFDKDQNGFISAAELRHVMTNLGEKLTDEEVDEMIREADVDGDGQINYEEFVKVMMAK	Z-box binding factor 3 [Arabidopsis thaliana]	Calmodulin-1/11/16 OS=Daucus carota GN=CAM-1 PE=2 SV=2	Ca2+-binding protein (EF-Hand superfamily)	Signal transduction mechanisms ; Cytoskeleton ; Cell cycle control, cell division, chromosome partitioning ; General function prediction only ;	K02183|1|7e-82|300|vvi:100232908|calmodulin	GO:0006084//acetyl-CoA metabolic process;GO:0010099//regulation of photomorphogenesis;GO:0005513//detection of calcium ion;GO:0006944//cellular membrane fusion;GO:0048193//Golgi vesicle transport;GO:0009846//pollen germination;GO:0030163//protein catabolic process;GO:0019722//calcium-mediated signaling;GO:0009612//response to mechanical stimulus	GO:0005509//calcium ion binding;GO:0005515//protein binding	GO:0005774//vacuolar membrane;GO:0005634//nucleus;GO:0005886//plasma membrane
	Gorai.012G156400.1|PACid:26825387	1.32±0.02	1.61±0.07	1.04±0.05	1.30±0.09	517	59342	MSSHSVGMEIVEDVVIVGAGIAGLTTSLGLHRLGIRSLVLESSEGLRITGFAFTTWENAWKALDAIGIGDSLRRLHYLLSSIVVASTVLEKPAVSEMSFKGHDIRCVQRRLLLETLAKELPNGTIRFSSKVVSIDESEDHFKRLHLADGAILKTKVLIGCDGVNSVVAKWLGLQNPVFSGRSSIRGNAHFKGGHGFEPKLRQFAGKGFRSGFLPCDDENVYWFLTWTPATKEEEMEDNPLKLKQLVTSKLKDASDEMKSVIEKTLLDDITSSPLRYRKPWELLWGNISKGNVCVAGDALHPMTPDIGQGGCSALEDGVVLARCLGEALLKPGVEDEEYERIETGLKKYGQERKWRSFDLITTAFMVGFIQQHEGKVMSYLRDKFMLRFLSGLLSRKAGF…	photosystem II protein V [Spinacia oleracea] >gi|28261734|ref|NP_783249.1| photosystem II protein V [Atropa belladonna] >gi|34500931|ref|NP_904116.1| photosystem II protein V [Amborella trichopoda] >gi|68164820|ref|YP_247616.1| photosystem II protein V [Cucumis sativus] >gi|91208919|ref|YP_538952.1| photosystem II protein V [Gossypium hirsutum] >gi|119368516|ref|YP_913204.1| PSII cytochrome b559 …	Cytochrome b559 subunit alpha OS=Oenothera elata subsp. hookeri GN=psbE PE=3 SV=4	2-polyprenyl-6-methoxyphenol hydroxylase and related FAD-dependent oxidoreductases	Coenzyme transport and metabolism ; Energy production and conversion ;	K02707|1|1e-23|108|mtr:MetrCp041|photosystem II cytochrome b559 subunit alpha	GO:0010583//response to cyclopentenone;GO:0045087//innate immune response;GO:0009617//response to bacterium;GO:0050832//defense response to fungus	GO:0004497//monooxygenase activity	GO:0005739//mitochondrion
	Gorai.007G294200.1|PACid:26784011	1.36±0.10	1.35±0.07	1.11±0.05	1.22±0.07	2397	39027	METILSSHSLHPILNPKASISKNLLLPSQQPRPASLFLSKPITCTPNKPTSQLVKPSLAEPRNWFVHAQQGLAALAISLALNFSPVLYTGNAIASEFDVINEGPPKESYVVDDANVLSRVTKSDLKRLLSDLESRKNFHINFITVRKLTSKADAFEYADQVLERWYPTLEEGSNKGIVVLVTSQKEGAVTGGPAFVQAVGENILDATVTENLPVLATEEKYNEAVYSSAKRLVAAIDGLPDPGGPQVKDNKRESNFKSREETEEKRGQFSLVVGGLLVIAFVVPMAQYYAYVSKK	hypothetical protein OsJ_18480 [Oryza sativa Japonica Group]	UPF0603 protein Os05g0401100, chloroplastic OS=Oryza sativa subsp. japonica GN=Os05g0401100 PE=3 SV=1	Beta-propeller domains of methanol dehydrogenase type	General function prediction only ;	-	GO:0016117//carotenoid biosynthetic process;GO:0035304//regulation of protein dephosphorylation;GO:0006636//unsaturated fatty acid biosynthetic process;GO:0010114//response to red light;GO:0010207//photosystem II assembly;GO:0019288//isopentenyl diphosphate biosynthetic process, mevalonate-independent pathway;GO:0015995//chlorophyll biosynthetic process;GO:0009773//photosynthetic electron transpo…	GO:0003993//acid phosphatase activity	GO:0009543//chloroplast thylakoid lumen;GO:0009535//chloroplast thylakoid membrane
Note: a protein number from the iTRAQ method; b the protein abundance ratio between the two samples, 4 and 24 mean 200mM salt treatment for 4h and 24h, N and Z mean Nan Dan Ba Di Da Hua and Earlistaple 7, respectively; c The identification score of the protein; d The mass of the protein.
